# Supplementary material for: Synthesis of folic acid, histidine, and serine-functionalized and boron and phosphorus-doped graphene quantum dots with excellent yellow luminescence behavior in aqueous/solid states and their use for the fluorescence detection of Fe2+ in urine
Source: Royal Society of Chemistry journal article supplement (doi:10.1039/d4nj02728k), 2024-01-01
Supplement: d4nj02728k1.pdf [file d4nj02728k1.pdf]

## **Electronic Supporting Information (ESI)**

**Synthesis of folic acid, histidine and serine-functionalized and boron and phosphorus-doped graphene quantum dot with excellent yellow luminescence behavior in aqueous/solid state and its use for fluorescence detection of Fe<sup>2+</sup> in urine**

**Li Ruiyi, Xie Qingqing, Wang Ye, Li Zaijun\* and Liu Xiaohao**

*Key Laboratory of Synthetic and Biological Colloids, Ministry of Education, School of Chemical and Material Engineering, School of Life Science and Health Engineering, Jiangnan University, Wuxi 214122, China*

### **1. Figures**

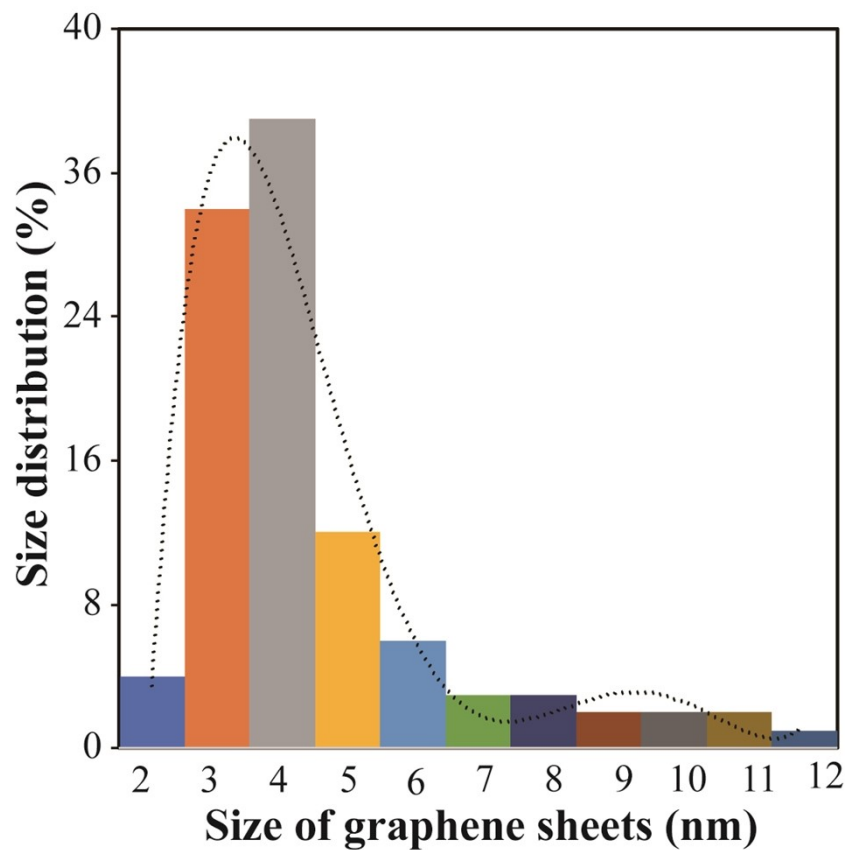

**Fig. S1** Size distribution of graphene sheets in FHS-GQD-B/P

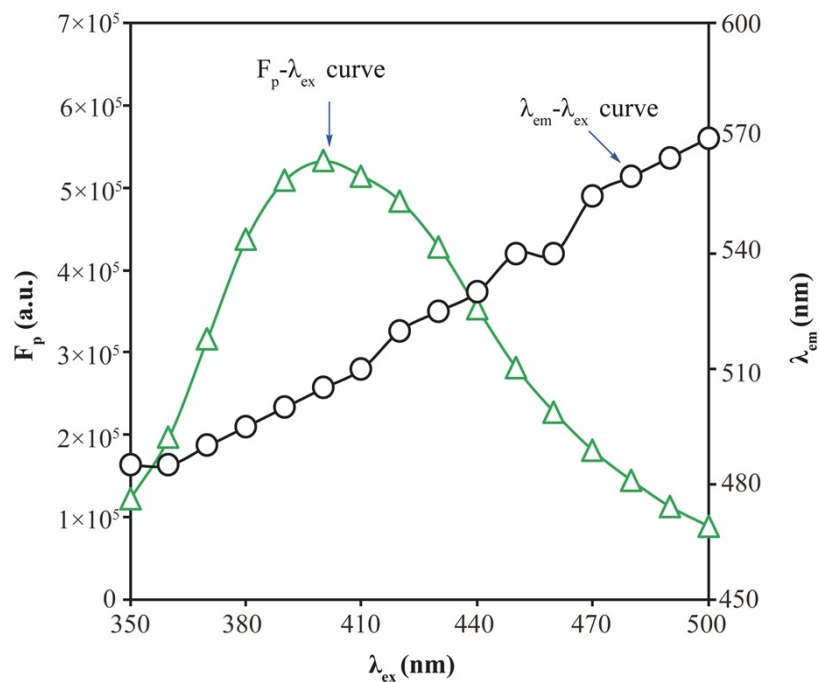

**Fig. S2** Plots of excitation wavelength vs. the  $F_p$  and the maximum emission wavelength

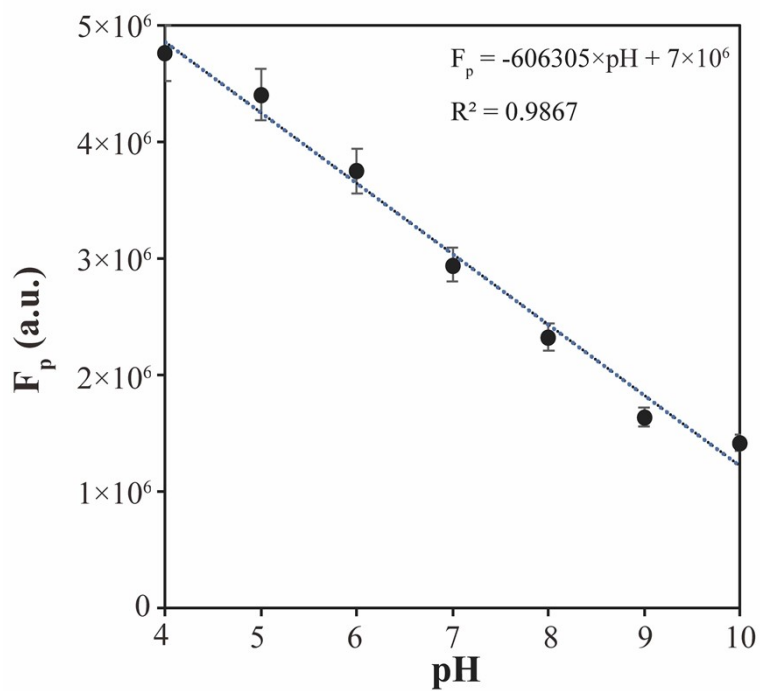

Fig. S3 Relationship curve of pH value with  $F_p$

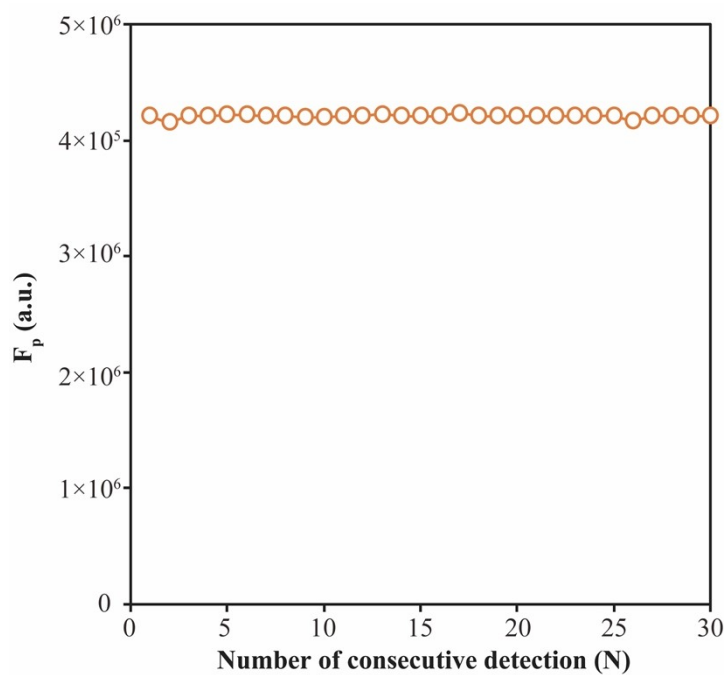

Fig. S4  $F_p$  values for different detection times

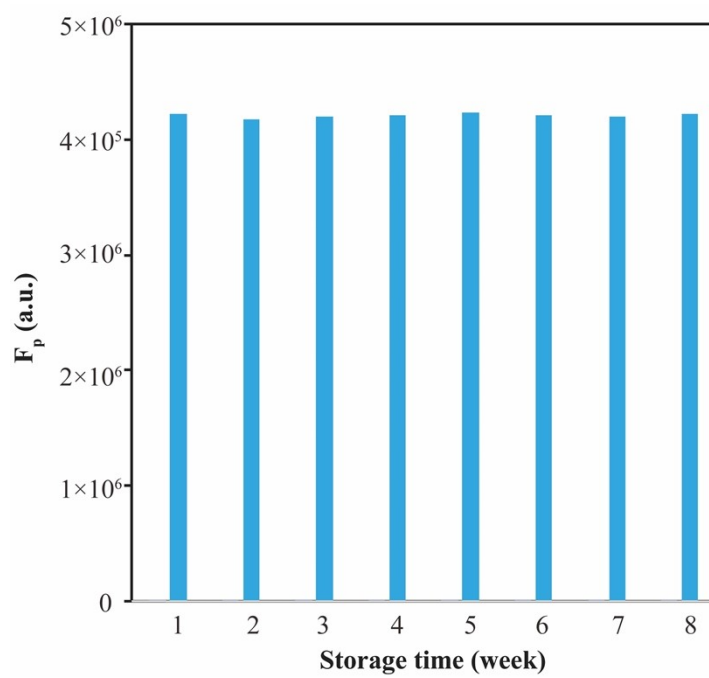

**Fig. S5**  $F_p$  values for different storage time
